# Supplementary material
Source: publisher figshare collection journal article supplement (https://gsapubs.figshare.com/ndownloader/files/34382558)
Supplement: Supplementary file 1 [file 34382558]

## Sheet: Sheet1
TABLE S3. LA-MC-ICP-MS SULFUR ISOTOPES OF SULFIDES FROM THE SHANGGONG GOLD DEPOSIT
Segment	No.	δ34SV-CDT (‰)	Mineral	Stage
Shanggong	SG-18-1	-12.7	Py	II
	SG-18-2	-15	Py	II
	SG-18-3	-13.8	Py	II
	SG-18-4	-10.8	Py	II
	SG-18-5	-14.9	Py	II
	SG-18-6	-12.1	Py	II
	SG-18-7	-12.1	Py	II
	SG-18-8	-14.8	Py	II
	SG-18-9	-14.9	Py	II
	SG-18-10	-15.4	Py	II
	SG-18-11	-13.3	Py	II
	SG-18-12	-11.7	Py	II
	SG-18-13	-16.8	Py	II
	SG-18-14	-12	Py	II
	SG-18-15	-14	Py	II
	SG-18-16	-10.8	Py	II
	SG-18-17	-12.3	Py	II
	SG-18-18	-12.1	Py	II
	SG-18-19	-14.6	Py	II
	SG-18-20	-14.4	Py	II
	SG-18-21	-12.7	Py	II
	SG-18-22	-13.2	Py	II
	SG-18-23	-14	Py	II
	SG-18-24	-12.9	Py	II
	SG-18-25	-13.7	Py	II
	SG-18-26	-16.1	Py	II
	SG-18-27	-13.6	Py	II
	SG-18-28	-12.6	Py	II
	SG-18-29	-13.6	Py	II
	1315-1	-15.6	Py	III
	1315-2	-15.8	Py	III
	1315-3	-15.6	Cpy	III
	1315-4	-15.2	Cpy	III
Liuxiugou	SG-1-1	-12.7	Py	II
	SG-1-2	-13	Py	II
	SG-1-3	-12.5	Py	II
	SG-1-4	-11.9	Py	II
	SG-1-5	-9.7	Py	II
	SG-1-6	-11.9	Py	II
	SG-1-7	-12.1	Py	II
	SG-1-8	-10.6	Py	II
	SG-1-9	-11.9	Py	II
	SG-1-10	-12.3	Py	II
	SG-1-11	-12.4	Py	II
	SG-1-12	-12	Py	II
	SG-1-13	-11	Py	II
	SG-1-14	-12.4	Py	II
	SG-1-15	-12.5	Py	II
Hugou	18SG-98-1	-14.8	Py	II
	18SG-98-2	-14.7	Py	II
	18SG-98-3	-14.5	Py	II
	18SG-98-4	-13.5	Py	II
	18SG-98-5	-14.3	Py	II
	18SG-98-6	-13.3	Py	II
	18SG-98-7	-16.2	Py	II
	18SG-98-8	-12	Py	II
	18SG-98-9	-17.5	Sp	III
	18SG-98-10	-14.8	Py	II
	18SG-98-11	-10.7	Py	II
	18SG-98-12	-11.8	Py	II
	18SG-98-13	-12.6	Py	II
	18SG-98-14	-14.2	Py	II
Qiliping	SG-52-1	-18.5	Sp	III
	SG-52-2	-16.7	Sp	III
	SG-52-3	-17.3	Py	II
	SG-52-4	-13.2	Py	II
	SG-52-5	-11.3	Py	II
	SG-52-6	-17.5	Py	II
	SG-52-7	-11.6	Py	II
	120(2)-1	-11.4	Py	II
	120(2)-2	-12.9	Py	II
	120(2)-3	-12.4	Py	II
	136-1	-9.5	Py	II
	136-2	-8.9	Py	II
	136-3	-8.7	Py	II
	136-6	-15.5	Py	II
	136-7	-13.8	Py	II
	136-8	-6.9	Py	II
	139-1	-12.4	Py	II
	139-2	-9.8	Py	II
	139-3	-10.6	Py	II
	139-4	-14.9	Py	II
	144-1	-11.3	Py	II
	144-2	-12.6	Py	II
